# Supplementary material for: Reduced graphene oxide-wrapped ZnS–SnS2 heterojunction bimetallic hollow cubic boxes as high-magnification and long lifespan supercapacitor anode materials
Source: Royal Society of Chemistry journal article supplement (doi:10.1039/d4nr01131g), 2024-01-01
Supplement: d4nr01131g1.pdf [file d4nr01131g1.pdf]

# RGO-wrapped ZnS-SnS<sub>2</sub> Heterojunction Bimetallic Hollow Cubic Boxes as High Magnification and Long Lifespan Supercapacitor Anode Materials

Xiaoqin Li<sup>1</sup>, Guoqing Feng<sup>1</sup>, Lingling Zhou<sup>1</sup>, Tiewei Zhao<sup>1</sup>, Feng Jiang<sup>1</sup>, Huiyu Li<sup>1</sup>, Yongsheng Liu<sup>1</sup>, Qing Yu<sup>2</sup>, Hao Ding<sup>2</sup>, Tian Zou<sup>2</sup>, Shanhai Zhao<sup>2</sup>, Jun cao<sup>2</sup>  
Yanyan Zhu<sup>1\*</sup>, Haijing Cao<sup>1\*</sup>

<sup>1</sup>College of Mathematics and Physics, Shanghai University of Electric Power, Shanghai 200090, China

<sup>2</sup>United Nova Technology Co., Ltd., Shaoxing 312000, PR China

Yanyan Zhu Email: [yyzhu@shiep.edu.cn](mailto:yyzhu@shiep.edu.cn)

Haijing Cao Email: [caohj@shiep.edu.cn](mailto:caohj@shiep.edu.cn)

## Supplementary information

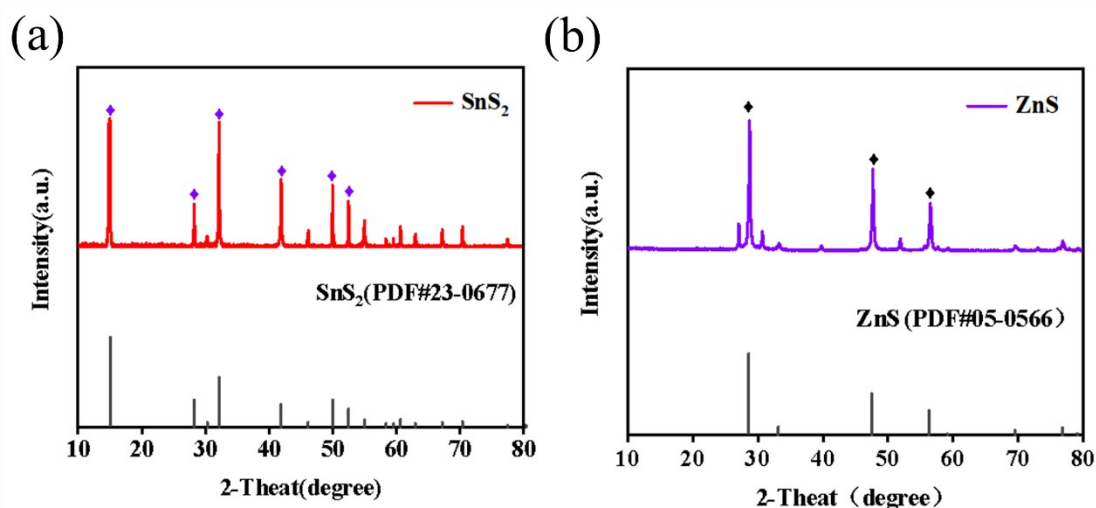

Fig.S1. (a) XRD image of SnS<sub>2</sub>. (b) XRD image of ZnS.

The diffraction peaks at 14.95°, 28.21°, 31.12°, 41.88°, 49.95° and 52.44° in In Fig.S2a are consistent with (001), (100), (101), (102), (110) and (111) of SnS<sub>2</sub> plane related. In Fig.S2b, the diffraction peaks at 28.72°, 47.680°, and 56.51° are related to the (111), (220), and (311) planes of ZnS, respectively.

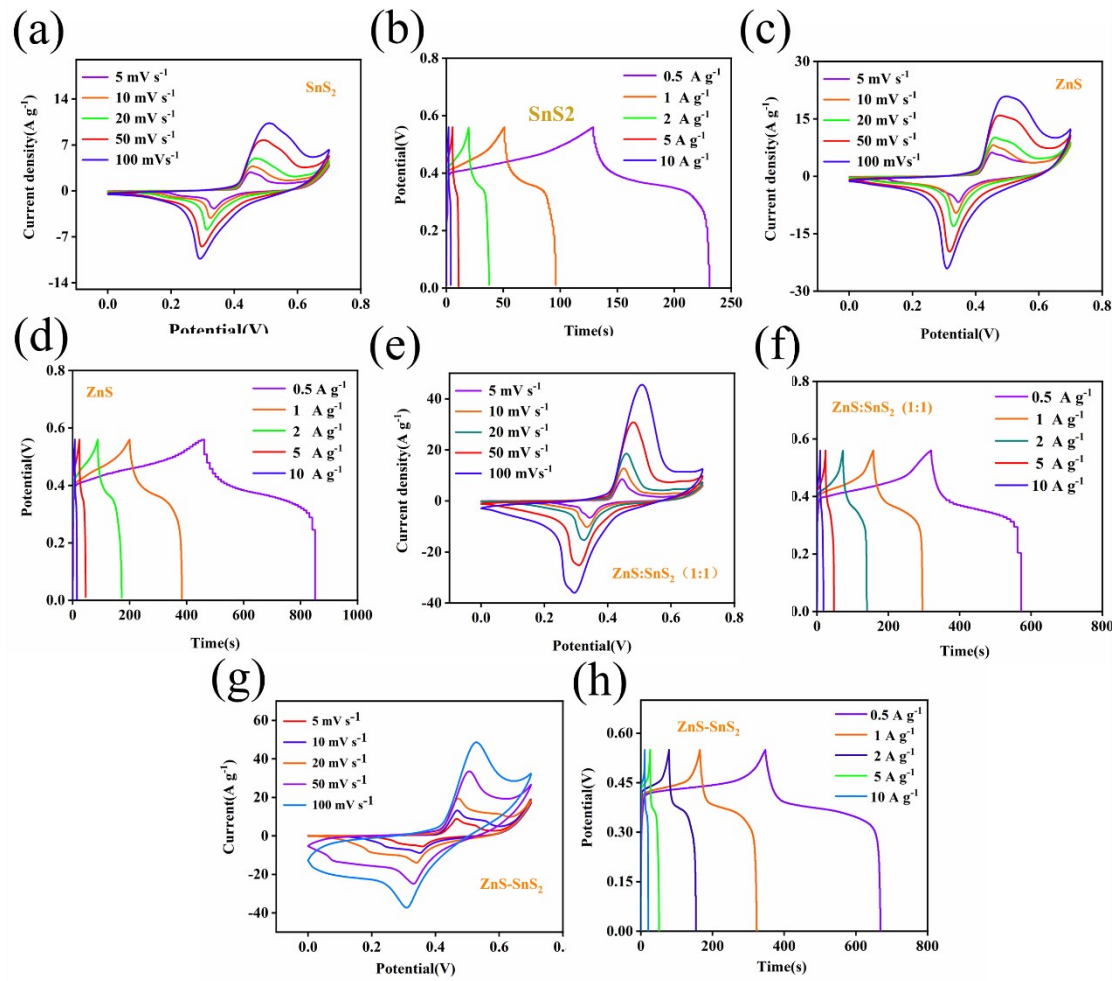

**Fig.S2.** (a) CV curve and (b) GCD curve of SnS<sub>2</sub> material. (c) CV curve and (d) GCD curve of ZnS material. (e) CV curve and (e) CV curve of ZnS:SnS<sub>2</sub>(1:1) material (f) GCD curve. (g) CV curve and (h)GCD curve of ZnS-SnS<sub>2</sub> material.

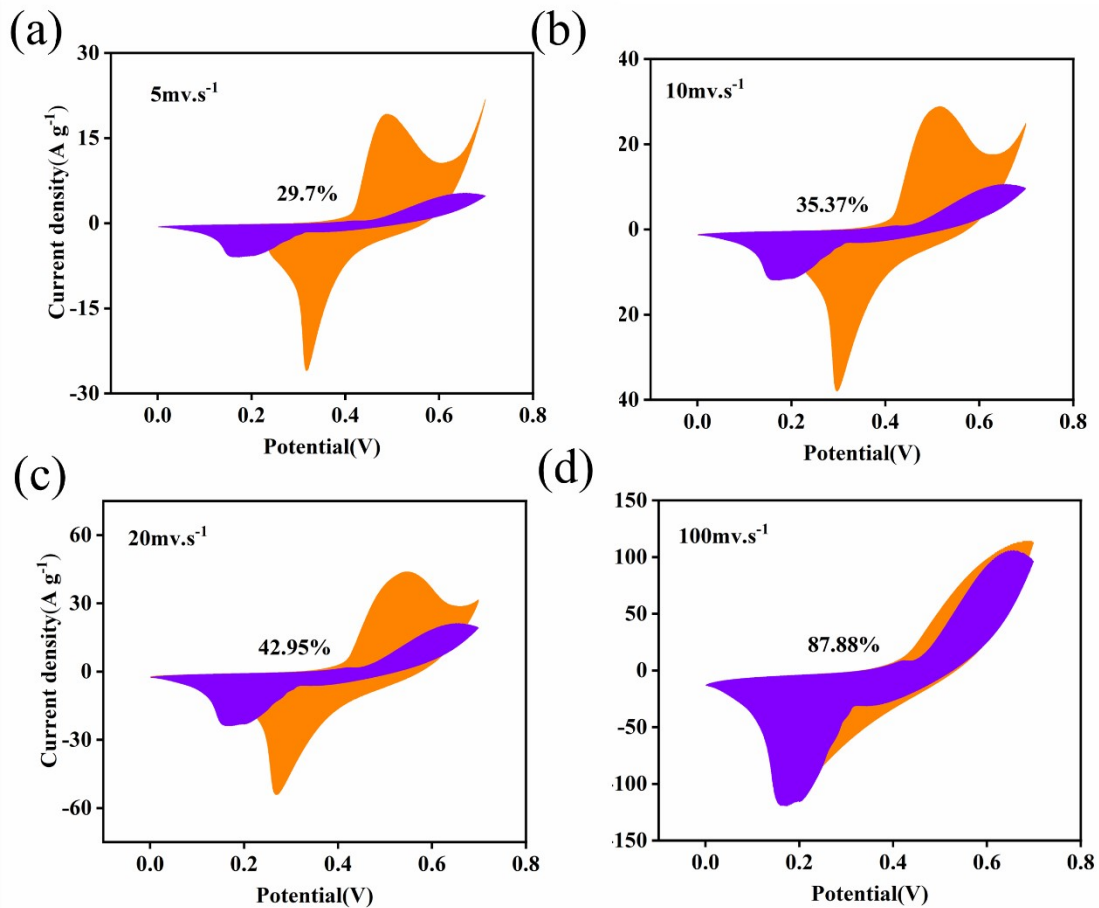

Fig.S3. Percentage of capacitive control at (a)  $5\text{mV}\cdot\text{s}^{-1}$ , (b)  $10\text{mV}\cdot\text{s}^{-1}$ , (c)  $20\text{mV}\cdot\text{s}^{-1}$  and  $100\text{mV}\cdot\text{s}^{-1}$  sweep rates.

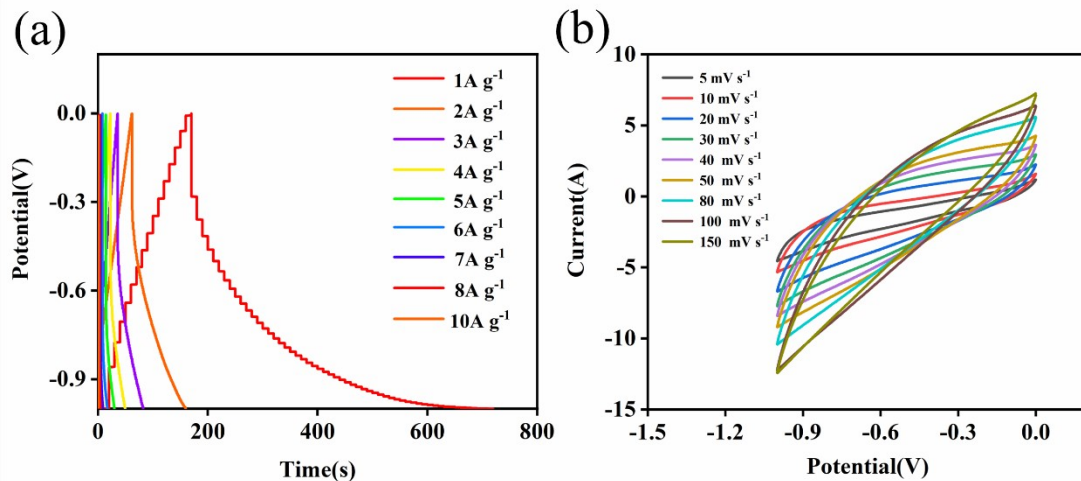

Fig.S4: (a) GCD curves of AC electrode at different current densities (b) CV curves of AC electrode at different scan speeds.

Table S1

Comparison of  $\text{ZnS-SnS}_2@\text{RGO}/\text{AC}$  with other  $\text{ZnS}, \text{SnS}_2$  related devices.

| Materials                                          | Specific capacitance                  | Current density or scan rate | Electrolyte | References |
|----------------------------------------------------|---------------------------------------|------------------------------|-------------|------------|
| $\text{Ni/SnS}_2@\text{Ni}(\text{OH})_2\text{-CC}$ | $158.1 \text{ mAh}\cdot\text{g}^{-1}$ | $0.5 \text{ A g}^{-1}$       | PVA-KOH     | [1]        |

|                                                |                        |                      |                                     |           |
|------------------------------------------------|------------------------|----------------------|-------------------------------------|-----------|
| SnS <sub>2</sub> /mK-BN/CNT                    | 87 F.g <sup>-1</sup>   | 2A.g <sup>-1</sup>   | 1M TEABF <sub>4</sub>               | [2]       |
| SnS <sub>2</sub> /rGO                          | 92.4 F.g <sup>-1</sup> | 1A.g <sup>-1</sup>   | 1M NaOH                             | [3]       |
| Mn-doped ZnS                                   | 98 F.g <sup>-1</sup>   | 1A.g <sup>-1</sup>   | 3M KOH                              | [4]       |
| g-C <sub>3</sub> N <sub>4</sub> /ZnS           | 92.8 F.g <sup>-1</sup> | 0.5A.g <sup>-1</sup> | 6M KOH                              | [5]       |
| ZnS-NiS1.97 hollow spheres                     | 123.6F.g <sup>-1</sup> | 0.5A.g <sup>-1</sup> | 3M KOH                              | [6]       |
| ZnS NWs/Cu <sub>7</sub> S <sub>4</sub> NPs/rGO | 112 F.g <sup>-1</sup>  | 1A.g <sup>-1</sup>   | 6M KOH                              | [7]       |
| porous carbon/ZnS                              | 82 F.g <sup>-1</sup>   | 1A.g <sup>-1</sup>   | 0.5M H <sub>2</sub> SO <sub>4</sub> | [8]       |
| ZnS-SnS <sub>2</sub> @RGO                      | 52.5F.g <sup>-1</sup>  | 1A.g <sup>-1</sup>   | PVA-KOH                             | This work |

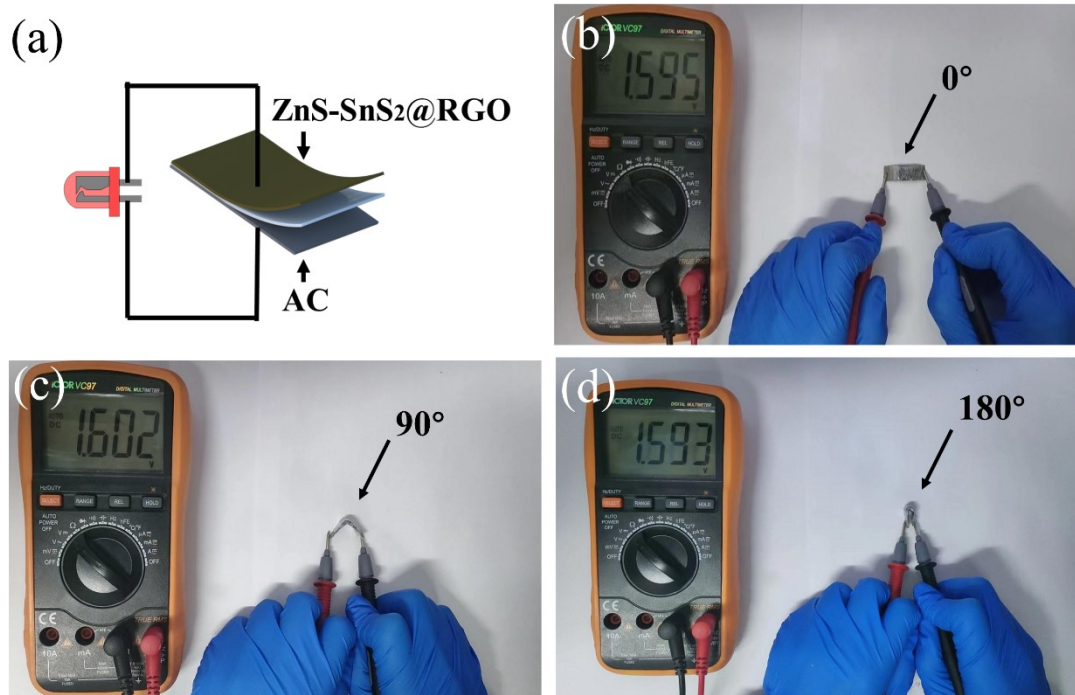

**Fig.S5. Schematic diagram of ASC device(a). Device voltages were measured after the ASC device was collapsed at 0° (b),90° (c),180° (d).**

## Reference

- [1] M. Liang, X. Li, Y. Kang, N.u. RehmanLashari, X. Zhang, Y. Zhao, H. Wang, Z. Miao, C. Fu, Ni-doped tin disulfide@Nickel hydroxide as robust cathode toward durable supercapacitor and aqueous Ni-Zn battery, *Journal of Power Sources*, 535 (2022), <http://10.1016/j.jpowsour.2022.231486>.
- [2] C.K. Maity, S. Sahoo, K. Verma, G.C. Nayak, SnS<sub>2</sub>@Conducting Energy Level-Induced Functionalized Boron Nitride for an Asymmetric Supercapacitor, *Energy & Fuels*, 36 (2022) 2248-2259, <http://10.1021/acs.energyfuels.1c04436>.
- [3] M. Sajjad, Y. Khan, W. Lu, One-pot Synthesis of 2D SnS<sub>2</sub> Nanorods with High Energy Density and Long Term Stability for High-Performance Hybrid Supercapacitor, *Journal of Energy Storage*, 35 (2021), <http://10.1016/j.est.2021.102336>.
- [4] I. Hussain, D. Mohapatra, G. Dhakal, C. Lamiel, S.G. Mohamed, M.S. Sayed, J.-J. Shim, Different controlled nanostructures of Mn-doped ZnS for high-performance supercapacitor applications, *Journal of Energy Storage*, 32 (2020), <http://10.1016/j.est.2020.101767>.
- [5] B. Wei, H. Liang, R. Wang, D. Zhang, Z. Qi, Z. Wang, One-step synthesis of graphitic-C<sub>3</sub>N<sub>4</sub>/ZnS composites for enhanced supercapacitor performance, *Journal of Energy Chemistry*, 27 (2018) 472-477, <http://10.1016/j.jechem.2017.11.015>.
- [6] C. Wei, Q. Ru, X. Kang, H. Hou, C. Cheng, D. Zhang, Self-template synthesis of double shelled ZnS-NiS<sub>1.97</sub> hollow spheres for electrochemical energy storage, *Applied Surface Science*, 435 (2018) 993-1001, <http://10.1016/j.apsusc.2017.11.187>.
- [7] X. Li, J. Cao, L. Yang, M. Wei, X. Liu, Q. Liu, Y. Hong, Y. Zhou, J. Yang, One-pot synthesis of ZnS nanowires/Cu<sub>7</sub>S<sub>4</sub> nanoparticles/reduced graphene oxide nanocomposites for supercapacitor and photocatalysis applications, *Dalton Transactions*, 48 (2019) 2442-2454, <http://10.1039/c8dt04097d>.
- [8] S. Kaipannan, P.A. Ganesh, K. Manickavasakam, S. Sundaramoorthy, K. Govindarajan, S. Mayavan, S. Marappan, Waste engine oil derived porous carbon/ZnS Nanocomposite as Bi-functional electrocatalyst for supercapacitor and oxygen reduction, *Journal of Energy Storage*, 32 (2020), <http://10.1016/j.est.2020.101774>.
